# Supplementary material for: Approaches to governance of participant-led research: a qualitative case study
Source: PubMed Central journal article supplement — BMJ Open. 2019 Apr 2;9(4):e025633. doi: 10.1136/bmjopen-2018-025633 (PMC6500204; doi:10.1136/bmjopen-2018-025633), 2019-04-02
Supplement: bmjopen-2018-025633supp001.pdf [file bmjopen-2018-025633supp001.pdf]

Supplementary Table 1. Semi-Structured Interview Questions

| Question Number | Question Text                                                                                                                                                                                                                                                                                                                                          |
|-----------------|--------------------------------------------------------------------------------------------------------------------------------------------------------------------------------------------------------------------------------------------------------------------------------------------------------------------------------------------------------|
| 1               | How long have you been doing self-tracking experiments?                                                                                                                                                                                                                                                                                                |
| 2               | How did you become involved with the Blood Testers project?                                                                                                                                                                                                                                                                                            |
| 3               | Do you have any formal or informal research training?                                                                                                                                                                                                                                                                                                  |
| 4               | Have you ever been part of a participant-led research project?                                                                                                                                                                                                                                                                                         |
| 5               | Whose responsibility is it to determine that a participant-led research project is conducted ethically?                                                                                                                                                                                                                                                |
| 6               | What are the factors which should be considered for participant-led research to be conducted ethically?                                                                                                                                                                                                                                                |
| 7               | Do you feel this project put you at any risk? Why or why not?                                                                                                                                                                                                                                                                                          |
| 8               | Was there anything in the project that surprised you, or that you wished you had known in advance?                                                                                                                                                                                                                                                     |
| 9               | Would your assessment of the project's risk change if you were with a group of people that you didn't know?                                                                                                                                                                                                                                            |
| 10              | Did you feel that it was important to discuss the benefits and risks in the Blood Testers project?                                                                                                                                                                                                                                                     |
| 11              | I am going to ask you to rank three different things that we did in the project, from most useful to least useful, in terms of informing you about risks and benefits. Those things are, written materials about the project, a webinar where we met and talked about ethical ramifications in the project. The third one is one-on-one communication. |
| 12              | Would you have felt comfortable halting your participation at any time?                                                                                                                                                                                                                                                                                |
| 13              | In the future, are there any kinds of research training materials that would be useful to you for personal or participatory research projects?                                                                                                                                                                                                         |
| 14              | Would you be interested in joining another round of participant-led research in the future?                                                                                                                                                                                                                                                            |
| 15              | Given that in this project participants can halt their participation at any time, do you think there is any way for a participant to be coerced into participation or continuation?                                                                                                                                                                    |
| 16              | Do you rate yourself completely confident, somewhat confident, or not at all confident with your understanding of risks and benefits of participation?                                                                                                                                                                                                 |
